# Supplementary material for: Urban Active Transportation Behaviour is Sensitive to the Fresh Start Effect: Triangulating observational evidence from real world data
Source: Research Square preprint supplement (doi:10.21203/rs.3.rs-5375352/v1), 2024-12-05
Supplement: Supplementary file 2 [file e63bd563db63e2b3e5b8e9dd.docx]

Table 1. Neighbourhood characteristics within 400m of each trail

|  | **Trail A**  **AM** | **Trail B**  **NPG** | **Trail C**  **YRG** | **Trail D**  **TT** | **Trail E**  **Harte Trail** |
| --- | --- | --- | --- | --- | --- |
| ***Trail type*** | AT | AT | AT | Leisure | Leisure |
| ***Demographics*** |  |  |  |  |  |
| Dissemination Areas* (DA) | 60 | 80 | 32 | 35 | 14 |
| N** | 26,791 | 31,924 | 12,361 | 12,710 | 1607 |
| Female** (%) | 53.26% | 53.12% | 52.80% | 51.43% | 51.8% |
| Age** (years) | 53.00 | 54.00 | 52.95 | 50.81 | 54.20 |
| Visible Minority* (%) | 15.60% | 10.82% | 6.88% | 6.37% | 16.95% |
| Immigrated last 10 years* (%) | 4.95% | 3.97% | 2.47% | 1.80% | 7.8% |
| ***Socioeconomic indicators*** |  |  |  |  |  |
| SEFI** | -0.6240 | -0.2165 | -0.3670 | -0.3108 | -0.3959 |
| Household income* | $78,903.78 | $67,918.18 | $64,027.56 | $68,255.49 | $96,205 |
| Average Property Value† | $150,949.41 | $116,183.20 | $104,129.83 | $106,676.21 | $720,559 |
| Population without high school graduation* (%) | 19.57% | 25.39% | 19.30% | 24.40% |  |
| Unemployment Rate* | 5.15% | 4.79% | 4.22% | 4.97% | 5.85% |
| ***Activity indicators*** |  |  |  |  |  |
| Fitness/Recreation Centres within 5km† (2018 only) | 96.20 | 100% | 61.82% | 100% | 95.5% |
| Average Distance to greenspace† (m) | 192.65 | 154.89 | 162.92 | 160.99 | 125.22 |
| Walkability Score‡ | -0.0798 | 0.4680 | 0.0726 | -0.0366 | 0.236 |
| Active commuting* (%) | 6.25% | 5.03% | 5.59% | 3.47% | 3.94% |

AT = active transportation; SEFI = socioeconomic factor index. AM = Awasisak Meskanow; NPG = Northeast Pioneers Greenway; YRG = Yellow Ribbon Greenway; TT = Transcona Trail.
